# Supplementary material
Source: Research Square preprint supplement (doi:10.21203/rs.3.rs-8147817/v1)
Supplement: Supplementary file 1 [file 9036aea7bb6fafe91b4f3af7.xlsx]

## Sheet: Sheet1
AIL1	AIL2	AIL3	AIL4	AIL5	PEU1	PEU2	PEU3	PEU4	PEU5	PU1	PU2	PU3	PU4	PU5	IA1	IS2	IS3	IS4	IS5	AI1	AI2	AI3	AI4	AI5	FRS1	FRS2	FRS3	FRS4	FRS5	GE1	GE2	GE3	GE4	GE5
1	1	1	1	1	1	1	1	2	2	1	1	1	1	1	1	1	1	1	1	1	1	3	1	5	1	3	1	4	4	2	1	1	3	1
2	1	1	1	2	1	2	1	1	1	1	1	1	1	1	1	1	1	1	1	1	2	2	2	2	2	2	1	1	1	1	2	2	2	2
1	1	1	1	1	1	2	1	2	2	2	1	1	2	2	2	1	1	1	1	1	2	3	3	3	3	2	1	1	1	2	2	2	2	2
4	2	2	2	2	5	5	5	3	3	3	3	3	1	1	1	2	4	4	4	4	4	2	2	2	2	2	4	4	4	4	2	2	5	1
3	3	3	3	3	2	2	2	2	2	3	2	2	3	2	2	2	2	3	3	3	3	4	3	4	3	2	3	3	3	3	2	2	3	2
1	2	2	1	1	1	2	3	3	3	2	2	2	5	2	2	3	3	3	4	4	5	5	5	5	5	5	3	4	4	5	5	5	5	1
2	2	2	1	1	1	1	2	2	3	2	1	2	4	2	2	1	1	2	2	2	2	4	2	4	4	3	2	3	2	3	2	2	2	2
1	1	1	1	1	1	1	1	2	1	2	2	2	1	1	2	1	1	1	1	1	1	3	2	4	2	2	2	2	1	2	2	1	3	2
2	2	2	2	2	2	2	2	2	2	2	2	2	2	2	2	2	2	2	2	2	2	2	2	2	2	2	2	2	2	2	2	2	2	2
3	4	2	2	3	4	4	3	2	2	3	4	4	3	2	2	3	3	2	3	3	4	2	4	2	4	2	3	4	4	4	2	2	3	2
1	1	1	1	1	1	1	1	1	1	1	1	1	3	1	1	1	1	1	1	1	1	5	1	3	5	4	1	1	1	1	1	1	3	1
2	2	2	2	3	2	2	1	2	3	2	2	2	2	2	2	2	2	2	2	2	2	2	2	2	2	2	2	2	2	2	2	2	2	2
1	1	4	3	4	4	4	4	5	4	3	5	5	5	4	3	3	4	3	4	4	4	5	4	4	5	3	4	4	4	5	4	4	4	4
3	4	4	3	4	3	4	4	3	3	3	4	4	4	4	4	4	4	4	4	4	3	3	3	3	4	3	4	4	4	4	4	4	3	4
3	3	4	4	4	3	3	3	3	3	2	2	2	2	2	2	2	2	2	2	2	4	1	2	2	2	2	2	2	2	2	2	2	4	2
5	5	4	5	5	5	4	5	4	5	5	4	4	5	5	5	5	5	5	3	5	5	1	5	5	1	5	5	5	5	4	5	5	5	5
5	5	5	5	4	5	4	3	3	4	4	5	4	4	5	5	5	3	4	3	3	2	1	2	1	2	2	4	4	4	2	5	5	4	5
4	5	5	4	5	4	5	3	3	5	5	5	4	5	5	5	5	5	5	5	5	4	4	5	4	5	4	5	5	5	4	4	5	3	4
5	5	5	5	5	5	5	4	4	4	5	5	5	4	5	4	5	5	5	4	4	4	3	4	4	3	4	5	5	5	5	4	5	5	5
4	4	4	3	4	4	4	1	3	4	4	4	3	3	4	4	1	1	3	3	2	3	2	4	4	4	3	3	2	3	3	4	4	4	3
5	5	5	5	5	5	4	5	4	5	5	5	5	4	4	4	5	5	4	4	4	5	3	4	1	1	5	5	5	5	4	4	5	3	4
4	4	4	4	4	4	4	3	3	4	4	4	3	3	3	4	4	3	4	5	4	4	5	3	5	5	5	2	4	3	3	5	5	2	5
3	4	4	4	4	4	5	5	4	4	4	5	4	5	5	4	5	5	4	5	5	5	4	5	4	4	5	4	4	4	5	4	5	5	4
5	5	5	5	5	5	5	5	4	4	5	5	5	5	5	3	4	4	4	4	4	4	3	3	4	3	3	4	5	5	4	5	5	4	4
5	5	5	5	5	5	4	4	5	5	5	5	5	5	5	5	5	5	5	5	5	5	5	4	5	4	5	4	5	5	5	4	5	5	5
5	5	5	5	5	5	5	5	5	4	5	5	5	4	5	5	5	5	5	5	5	5	3	4	4	5	2	5	5	5	5	5	5	5	1
2	4	5	5	5	2	3	2	3	3	5	5	5	4	4	4	2	5	4	3	5	5	2	4	3	4	3	5	5	5	4	5	2	4	5
4	4	4	4	4	4	4	4	4	5	3	3	5	5	4	4	4	4	4	4	5	5	4	3	3	4	4	4	4	4	4	4	4	5	4
5	5	5	5	5	5	4	3	4	4	4	4	4	5	4	5	4	5	5	4	4	4	3	3	3	4	4	4	4	3	4	5	3	4	3
4	4	4	4	4	4	4	3	4	4	4	3	4	4	4	4	4	3	4	3	3	4	4	3	3	4	4	4	3	4	3	4	4	4	4
5	5	5	5	5	5	4	4	1	5	4	3	4	5	4	4	3	5	5	5	5	5	3	4	4	1	4	5	5	5	4	5	5	5	5
4	4	4	4	4	4	4	4	4	4	4	4	4	2	4	1	3	3	3	2	2	2	2	2	3	3	4	2	4	4	2	4	2	2	4
3	1	2	2	1	2	4	2	3	3	3	2	4	2	4	2	2	2	1	2	3	4	4	1	3	2	3	3	2	4	2	4	4	4	3
3	4	3	2	3	2	3	4	4	3	2	4	4	5	4	3	4	3	3	3	4	3	2	3	4	4	3	4	4	3	3	3	4	3	3
4	4	4	4	4	4	4	4	5	5	5	4	5	4	5	5	4	5	4	5	4	5	4	4	5	4	4	5	4	4	5	4	4	5	4
3	3	2	3	3	4	4	3	4	5	5	5	5	5	5	5	5	5	5	5	4	4	1	2	2	4	3	4	4	4	4	4	4	5	5
2	4	3	4	4	3	4	2	4	4	2	2	4	2	3	2	4	4	2	3	5	2	2	4	4	2	5	2	5	2	3	2	4	4	4
4	4	4	5	4	4	4	3	3	2	5	5	5	5	5	5	5	4	4	5	4	5	4	4	1	1	5	4	5	5	4	5	5	3	5
5	5	5	5	5	5	5	5	5	5	5	5	5	5	5	5	5	5	5	5	4	4	3	5	5	1	5	5	5	5	4	5	5	5	5
4	4	5	5	5	4	4	4	3	4	4	4	4	3	5	5	5	5	4	3	4	4	3	4	2	3	4	5	5	4	4	4	5	4	5
3	4	2	5	5	4	2	5	5	5	5	5	4	3	2	1	2	2	5	5	5	5	3	4	2	4	2	2	2	2	3	3	2	3	2
4	5	5	5	5	4	3	3	3	3	4	4	4	4	4	4	4	3	4	3	3	4	2	4	3	3	2	5	4	5	5	3	5	5	3
4	4	3	4	5	5	5	4	4	4	4	4	4	4	4	4	4	4	4	4	4	4	5	5	2	4	4	5	5	5	5	4	5	5	4
4	4	3	4	5	5	5	4	4	4	4	4	4	4	4	4	4	4	4	4	4	4	5	5	2	4	4	5	5	4	5	5	5	5	4
4	4	4	3	3	4	4	3	4	4	4	5	4	4	4	3	4	4	4	4	5	5	4	4	4	4	4	4	4	5	4	5	4	4	4
5	5	5	5	5	5	4	4	4	4	5	4	4	4	4	5	5	5	5	4	4	5	5	5	5	5	5	5	4	5	4	5	5	5	5
4	3	4	5	5	4	3	3	5	4	3	4	4	4	2	3	2	3	4	2	4	3	3	4	3	3	5	4	5	4	3	4	5	5	4
3	3	3	4	2	3	4	4	3	3	4	4	3	1	4	2	3	3	4	4	4	4	5	4	4	4	5	4	1	2	3	4	3	1	1
3	4	4	4	3	4	4	3	3	4	4	4	4	4	4	4	4	3	4	3	3	2	2	3	1	3	4	4	3	4	3	5	5	3	4
3	3	4	4	4	3	3	4	3	3	4	4	4	3	4	3	3	4	3	4	4	4	4	4	5	4	2	3	3	3	4	3	4	3	4
3	4	3	4	4	3	3	4	4	4	5	5	5	4	5	1	1	1	1	1	3	5	4	1	3	3	5	4	4	4	4	4	4	4	4
4	4	5	5	5	4	4	5	4	4	4	4	4	5	5	4	5	5	5	4	4	4	2	2	2	2	5	5	4	5	4	4	5	4	5
5	5	5	5	5	5	5	5	5	5	5	5	5	3	5	5	5	5	5	5	5	5	3	5	5	5	4	5	5	5	5	5	5	2	5
3	4	5	4	5	5	5	5	3	2	5	5	4	5	5	4	5	4	3	5	2	2	2	2	1	1	1	5	4	4	5	5	5	1	1
3	4	4	4	4	3	3	3	4	3	3	3	3	4	4	4	3	3	4	3	3	3	3	3	4	4	4	2	3	3	2	4	4	3	5
4	4	5	5	4	4	5	5	5	5	4	4	3	5	5	5	5	5	5	5	5	5	4	5	5	5	5	3	5	5	4	4	4	4	5
5	4	5	4	4	4	4	5	5	5	5	4	5	4	4	5	5	4	5	4	3	2	4	3	4	3	4	4	4	4	5	4	4	3	3
4	4	4	3	3	3	2	3	3	3	3	3	2	2	3	2	2	2	2	2	3	2	2	2	2	2	5	2	2	2	2	3	2	2	2
5	5	5	5	5	5	5	5	4	5	5	5	5	4	5	5	5	5	5	4	4	5	1	4	4	1	4	5	5	4	3	4	5	5	5
2	5	5	4	3	4	5	5	5	3	4	5	4	5	4	5	4	5	5	5	4	4	3	2	2	2	5	5	5	5	4	4	4	5	5
4	4	4	4	4	4	4	4	4	4	4	4	4	4	4	3	3	4	3	4	3	2	2	2	2	2	4	5	4	4	3	4	4	4	5
5	5	1	1	3	3	2	3	4	1	3	3	1	4	2	3	1	3	4	2	1	5	1	2	3	2	5	1	1	3	3	2	2	2	4
5	5	5	5	5	5	5	5	5	5	5	5	5	3	4	5	5	5	5	4	5	5	5	5	5	5	5	5	5	5	5	5	5	2	5
3	3	3	3	5	3	4	5	3	5	4	3	4	4	5	3	4	4	3	4	5	4	3	4	4	4	1	5	3	5	3	3	4	4	3
2	4	4	4	4	4	4	4	5	4	4	4	4	5	5	4	5	5	4	4	4	4	5	5	4	4	5	5	4	4	5	4	4	5	5
4	4	5	4	4	4	5	5	4	4	3	5	5	5	3	4	4	4	4	4	5	5	4	4	3	3	5	4	4	4	3	4	4	4	5
2	2	2	2	2	2	2	2	2	2	2	1	1	1	2	4	4	4	4	4	4	3	4	3	4	3	4	4	4	3	3	3	4	4	4
2	3	4	5	5	4	1	3	4	4	5	4	5	4	4	5	5	5	5	5	5	5	3	4	4	3	4	5	5	5	4	4	4	3	4
4	4	4	5	5	5	5	5	5	5	5	5	5	5	4	4	4	4	4	5	5	5	5	5	5	5	4	4	5	5	5	5	5	5	5
4	5	5	4	4	4	5	5	5	5	4	4	4	4	4	4	4	4	5	5	5	5	4	5	4	5	4	4	5	4	5	4	5	4	4
5	5	5	5	4	5	5	5	5	5	4	5	5	4	4	4	4	4	5	5	5	4	5	4	5	4	5	4	5	4	5	4	5	4	5
5	4	4	4	3	3	4	4	4	3	3	4	3	4	4	4	3	4	3	3	3	4	3	4	4	4	4	3	3	4	4	4	4	3	4
5	5	5	5	5	5	5	4	3	4	5	4	4	4	4	4	5	4	5	5	5	4	4	5	5	5	4	4	4	5	5	5	5	4	5
4	5	5	5	4	5	4	3	4	3	4	5	5	3	4	4	3	3	4	3	1	5	2	2	4	1	5	4	4	4	3	4	4	4	5
5	4	4	4	4	4	4	4	4	3	4	4	4	4	4	3	4	4	4	4	4	4	3	3	4	4	4	5	4	5	4	3	4	3	4
5	5	5	5	5	5	5	4	5	4	5	3	4	4	3	5	4	3	5	3	5	5	5	4	5	5	5	5	4	4	4	4	5	5	5
5	5	5	5	5	5	4	3	5	5	5	5	5	4	5	4	5	5	5	5	4	4	3	5	2	5	5	5	5	5	3	3	5	5	5
5	5	5	5	5	4	4	4	4	4	4	5	4	5	5	5	5	4	4	4	4	4	1	3	4	4	3	5	3	4	4	5	5	4	4
4	4	4	4	4	4	4	4	2	2	2	2	2	2	3	3	3	2	2	2	2	2	3	4	3	2	5	3	3	2	2	5	5	3	3
2	4	4	4	4	2	2	2	4	4	2	2	2	3	4	4	3	3	3	2	2	2	2	2	4	2	5	2	2	2	2	3	4	2	5
5	5	5	5	5	5	5	4	4	4	5	4	4	4	5	5	4	3	4	4	4	4	4	3	4	3	5	4	4	4	4	5	4	4	5
5	5	5	5	5	5	5	4	4	4	4	4	5	4	5	3	5	5	4	5	5	5	5	4	2	5	3	4	4	4	4	4	4	3	5
4	4	4	4	4	4	3	3	4	4	4	5	5	4	4	4	5	5	5	4	4	3	3	3	4	3	4	4	4	3	3	3	5	4	5
5	5	5	5	5	4	4	5	3	4	4	4	4	4	4	4	5	4	5	3	4	5	4	3	4	3	4	4	4	4	4	5	5	4	5
4	4	5	4	5	3	4	2	2	4	3	3	4	4	4	5	4	3	3	3	4	4	2	2	2	2	2	4	3	3	4	4	5	3	5
4	4	3	4	4	3	2	3	1	3	3	4	3	3	4	2	2	1	1	3	3	3	3	3	1	1	5	5	3	4	4	4	5	4	4
3	4	3	4	3	3	4	4	3	4	4	4	4	4	4	4	4	3	3	1	1	1	1	5	1	1	5	5	5	3	4	5	5	4	5
5	5	5	5	5	5	5	5	5	5	5	5	5	3	4	5	5	5	5	3	4	1	2	4	1	1	5	5	4	4	3	5	5	5	5
5	5	5	5	5	4	4	4	5	4	5	4	5	5	5	5	5	5	5	5	5	5	1	3	2	2	4	5	4	4	5	5	5	5	4
4	4	4	4	5	4	4	3	3	4	4	5	4	4	4	2	3	3	4	4	4	4	4	3	4	3	5	4	5	5	2	5	5	2	4
5	5	5	5	5	5	5	5	4	5	5	4	5	5	5	4	4	5	5	5	4	5	4	4	4	5	4	4	5	5	4	5	5	5	5
5	5	5	3	5	3	4	4	3	3	4	5	3	3	4	3	4	5	3	3	4	3	3	4	3	4	4	5	3	4	2	4	3	3	5
5	5	4	5	5	5	4	4	5	5	5	5	5	5	5	4	5	5	5	5	5	4	5	4	3	4	5	4	5	5	5	5	5	5	4
4	4	3	4	4	3	5	4	3	5	4	5	3	4	5	4	4	5	4	4	4	5	5	4	4	4	4	4	4	4	5	4	4	5	4
5	5	5	5	5	4	5	4	4	4	5	5	4	5	4	5	5	5	5	2	2	4	4	4	2	2	2	4	5	5	4	5	5	2	5
4	5	5	5	5	5	4	4	3	4	5	4	4	5	5	5	5	5	5	3	5	5	5	5	4	5	5	5	3	4	4	4	4	4	4
3	2	2	4	3	4	2	2	3	2	3	2	3	3	5	5	3	1	1	1	1	2	4	3	4	4	3	2	3	5	2	3	2	3	4
5	4	5	4	5	4	4	4	3	4	4	4	4	3	4	3	4	3	4	1	3	3	2	1	1	1	2	3	3	3	3	5	4	1	5
5	5	5	5	5	5	5	5	4	5	1	5	5	5	5	5	5	5	5	5	5	5	1	5	5	1	5	5	5	5	5	5	5	1	5
4	4	4	3	3	4	3	2	2	3	4	3	4	3	4	3	3	3	3	3	3	2	2	4	4	2	4	3	3	3	3	4	4	3	4
5	5	5	5	3	3	2	2	3	2	1	1	2	2	3	5	1	1	2	1	1	2	4	2	1	3	5	3	3	4	3	4	4	3	4
4	4	3	2	2	4	4	4	5	4	4	4	4	4	4	4	4	4	4	4	4	3	4	4	5	5	4	5	4	4	5	4	5	5	5
4	4	2	2	4	2	2	2	4	2	2	2	4	4	4	2	1	1	1	1	2	4	4	1	1	1	1	3	3	3	5	4	3	1	5
4	4	4	4	4	5	5	5	4	4	5	4	5	4	5	5	4	5	4	3	4	3	4	4	3	3	5	5	5	5	4	5	4	2	5
5	5	5	5	5	5	5	4	5	5	4	5	5	4	5	5	1	5	5	3	3	4	2	3	1	2	5	5	4	3	5	5	4	2	5
5	5	5	3	5	4	4	4	4	4	4	4	4	5	5	5	5	5	5	5	5	5	5	5	4	4	5	4	3	4	4	3	5	5	4
5	5	5	5	5	5	5	4	5	4	5	5	5	5	5	5	5	3	4	2	2	4	2	3	3	4	4	5	4	5	5	5	5	5	4
5	5	5	5	5	5	4	2	3	3	4	4	4	4	3	2	2	1	2	1	3	3	2	1	3	3	2	3	4	4	3	5	4	2	5
4	4	5	5	3	5	4	4	2	2	4	4	4	3	5	5	4	3	4	3	4	4	3	3	3	3	2	4	4	5	4	4	4	3	5
5	5	4	3	3	4	3	3	3	4	3	3	2	3	3	3	4	3	4	4	3	4	3	3	3	4	3	2	4	4	3	3	4	2	3
4	4	3	3	4	3	3	3	3	4	4	4	5	3	5	5	5	3	5	3	3	3	1	3	4	5	5	4	5	3	3	5	5	5	5
5	5	5	5	5	5	5	5	4	5	5	5	5	5	5	5	5	3	5	3	5	5	1	5	3	3	3	5	5	5	5	5	5	4	5
5	5	5	5	5	5	5	4	5	5	5	5	5	5	5	5	5	5	5	5	5	5	1	3	1	2	5	4	5	5	5	4	4	5	5
3	4	4	4	4	3	3	3	4	4	4	3	3	2	3	3	3	3	3	3	1	1	3	3	1	3	3	4	3	4	2	4	4	3	4
5	5	5	5	5	4	3	3	4	3	4	3	3	3	3	3	4	3	1	1	1	3	2	4	2	3	3	3	3	2	2	2	3	3	2
4	4	4	3	4	5	5	5	5	5	5	5	5	5	5	5	5	5	5	4	5	5	3	3	1	3	3	5	5	5	5	4	5	5	4
5	5	5	5	5	5	5	5	5	5	5	5	5	5	4	4	4	5	4	5	4	5	5	5	2	5	5	4	5	5	5	5	5	5	4
5	4	5	4	3	4	4	4	4	4	4	4	4	4	4	4	5	5	5	4	5	4	3	3	3	3	2	4	4	4	5	4	4	5	4
5	5	5	5	4	4	5	5	5	5	5	5	5	5	5	5	5	5	5	5	5	5	5	5	5	5	5	5	4	5	5	5	5	5	4
4	5	5	5	4	5	4	4	4	4	5	5	4	4	4	5	3	5	5	4	3	3	4	4	2	1	4	4	4	4	3	4	5	5	5
5	5	5	4	5	4	4	4	5	4	5	4	4	5	5	4	5	4	4	4	5	3	4	3	1	1	3	4	5	5	4	5	4	4	5
3	3	4	3	5	5	4	3	4	4	4	5	4	4	3	4	5	5	4	5	4	3	3	4	4	4	4	4	4	4	3	4	4	5	5
4	5	4	4	4	4	4	4	5	5	4	4	4	5	5	5	5	3	4	3	3	4	5	4	4	4	5	4	4	4	3	4	4	4	5
2	2	2	2	2	4	4	4	4	3	4	4	4	4	4	5	5	4	4	4	4	5	4	5	4	4	4	4	4	4	4	4	4	4	5
4	4	4	4	4	3	5	3	1	3	3	5	4	5	5	5	5	4	3	4	3	4	3	4	4	5	3	4	3	4	3	5	5	4	5
4	4	4	4	3	3	3	3	3	4	5	3	3	3	3	3	3	3	4	3	4	5	4	3	3	3	3	3	3	4	4	3	5	5	4
5	5	4	4	4	4	4	3	3	3	4	4	4	4	4	4	4	4	4	2	3	3	3	3	2	2	5	4	4	4	3	4	4	5	5
4	4	5	5	5	5	5	5	5	5	5	5	5	5	5	5	5	5	3	5	5	5	4	3	5	5	5	5	5	5	5	5	5	5	4
4	4	4	4	4	4	4	4	4	3	4	5	4	4	4	4	3	4	4	4	4	4	3	3	3	1	2	4	4	4	4	4	3	5	5
4	4	4	4	4	4	3	4	4	3	3	3	4	3	4	4	3	3	4	3	3	2	2	1	2	2	5	4	4	4	2	4	3	4	4
5	5	5	5	5	5	5	4	5	5	5	5	4	2	4	3	5	5	5	3	5	5	4	4	5	4	5	5	5	5	5	5	5	2	4
4	4	4	4	4	4	4	4	4	4	4	4	2	4	2	2	2	4	4	4	4	4	4	4	5	4	4	3	3	3	3	4	4	2	4
5	5	5	5	5	3	3	3	2	1	3	3	4	1	4	5	3	1	2	1	1	3	2	4	4	4	4	5	5	5	4	4	4	4	4
3	4	5	5	5	4	3	3	5	4	5	3	5	2	3	4	5	5	5	1	5	1	2	5	1	3	5	5	5	5	2	5	5	5	5
4	4	2	4	5	3	3	5	3	3	4	4	3	3	4	4	3	3	1	2	4	1	3	2	2	4	4	4	2	3	4	4	5	4	3
4	4	3	3	4	5	5	3	3	3	4	5	5	5	4	4	5	4	4	4	5	4	3	4	4	4	3	4	4	4	4	5	5	5	5
5	4	4	5	4	4	5	4	4	4	5	5	5	4	4	4	5	4	4	3	4	4	3	3	1	3	3	4	4	4	5	4	5	4	4
4	4	4	4	5	5	4	4	3	4	4	3	4	4	5	5	5	3	4	3	3	4	4	3	3	3	3	4	4	4	3	5	4	4	4
2	3	2	4	4	5	3	4	1	2	3	2	2	1	1	1	1	1	1	1	3	3	2	2	2	2	2	5	2	3	2	1	2	2	1
3	3	3	4	3	4	2	3	4	4	4	4	4	4	4	4	4	3	4	2	2	2	3	2	2	2	2	4	4	4	2	4	4	3	4
4	3	3	4	4	4	3	3	4	4	4	4	4	3	4	4	5	5	4	4	3	4	4	2	2	2	5	3	3	4	3	2	5	5	4
5	5	5	5	5	5	5	5	5	4	5	5	5	5	5	5	5	5	5	5	5	5	5	5	5	5	5	5	5	5	5	5	3	3	1
4	5	5	5	4	4	5	5	5	5	4	4	5	5	4	5	5	5	4	5	4	5	5	3	3	2	3	5	5	5	4	4	3	4	5
5	4	4	5	1	3	2	1	4	3	4	5	4	4	5	4	4	4	4	2	4	1	1	4	1	3	4	4	4	5	3	4	2	1	4
4	4	3	1	4	2	3	3	1	3	3	2	1	1	2	1	1	1	1	1	1	1	1	4	1	3	5	2	4	1	3	5	5	1	5
4	4	4	5	4	5	5	5	4	4	5	5	4	5	5	3	1	1	1	1	1	5	1	1	4	3	5	2	3	4	2	5	2	5	5
5	4	5	5	5	5	5	5	3	5	4	5	5	5	5	4	5	5	3	5	5	5	1	4	4	3	4	4	4	5	4	5	5	5	5
5	3	3	4	2	4	3	4	3	3	3	3	4	5	3	1	2	3	3	4	3	4	3	2	3	3	5	3	5	5	3	5	2	4	5
4	4	5	5	5	5	5	5	5	5	5	5	5	5	4	4	5	4	4	3	5	5	1	1	2	3	5	4	5	5	4	5	5	2	5
5	4	3	5	4	4	5	5	5	4	4	5	5	4	5	4	5	5	5	5	5	5	2	4	4	4	4	5	5	5	5	5	5	5	5
5	5	4	4	3	3	4	4	5	4	5	5	4	5	4	5	4	5	5	5	5	5	5	5	4	4	4	5	5	4	3	4	5	4	4
4	4	3	2	2	1	2	3	4	3	4	4	3	3	3	4	5	4	3	2	1	3	1	1	4	3	2	1	2	5	3	5	5	5	4
4	5	5	3	3	3	4	4	3	3	3	4	4	4	5	5	5	3	3	5	5	4	4	4	1	3	5	3	3	3	4	4	4	3	4
5	5	5	5	5	5	4	5	4	5	5	4	5	5	4	4	5	5	4	5	5	4	3	3	2	4	5	5	5	5	5	4	5	5	3
5	5	4	5	5	5	5	5	5	5	5	5	5	5	5	5	5	5	5	5	5	5	5	5	5	2	5	4	4	5	4	4	4	5	4
4	4	3	4	5	5	3	3	2	4	4	5	4	5	5	5	5	5	5	3	4	5	3	1	3	2	5	3	3	3	3	5	5	1	5
4	4	4	4	4	5	5	4	5	5	5	5	5	4	4	4	4	4	5	4	5	5	4	4	4	4	4	4	4	4	4	5	5	5	4
5	4	5	5	4	4	4	4	4	4	4	4	4	4	4	4	3	3	4	3	3	3	2	2	4	2	5	4	4	4	3	5	5	5	5
4	4	5	5	3	4	4	5	5	4	4	4	4	4	4	4	4	4	3	3	3	2	4	2	2	2	4	4	5	5	5	3	4	4	4
3	3	4	4	3	2	2	2	3	3	2	3	4	2	4	4	3	2	3	2	2	2	4	2	2	3	4	2	3	3	2	4	4	4	4
4	5	4	4	5	4	4	3	2	3	4	4	4	4	4	4	3	2	3	3	3	4	2	3	3	2	5	4	4	4	3	4	4	1	3
5	5	5	5	5	5	5	5	5	4	4	4	4	3	4	4	4	4	4	3	3	3	3	3	2	1	4	4	5	4	5	5	4	5	5
4	4	4	3	4	5	4	5	5	4	4	4	4	5	4	4	5	5	5	5	5	5	2	2	1	3	3	3	3	5	3	5	5	5	3
5	5	5	4	4	5	5	5	5	5	5	4	5	5	5	5	5	5	5	5	5	5	4	5	5	3	5	5	4	4	5	5	4	4	5
2	2	3	3	3	3	3	3	1	3	3	4	1	3	4	5	3	3	3	3	3	3	5	1	3	3	5	3	5	5	1	5	3	3	5
4	4	3	4	5	4	5	4	4	5	5	5	5	5	4	4	5	4	4	4	4	4	5	2	1	1	4	4	4	4	4	5	5	5	5
5	5	5	5	5	4	4	3	5	5	5	4	5	2	5	5	5	5	5	4	2	2	2	3	5	4	4	4	3	4	4	4	4	4	4
5	5	5	5	5	4	4	3	5	5	4	4	4	4	3	2	2	2	2	2	1	1	1	3	2	3	4	4	3	4	3	3	4	5	4
5	5	5	5	5	5	5	5	5	5	5	5	5	5	5	5	5	4	5	4	5	5	3	4	3	1	5	5	1	3	2	5	5	5	5
1	1	1	3	2	4	5	5	3	2	5	5	3	2	2	4	5	3	3	1	1	1	1	3	3	3	1	3	2	1	1	4	4	3	2
3	4	5	5	5	5	4	5	5	5	5	3	4	4	3	3	4	4	5	4	3	4	3	3	4	4	3	4	4	4	5	5	5	5	5
5	4	5	5	4	5	5	5	4	5	5	5	5	5	5	5	5	5	5	5	5	5	5	5	5	5	5	4	5	3	5	3	5	5	5
5	5	5	5	5	5	5	4	5	4	4	4	5	5	3	3	5	5	5	5	5	5	2	3	1	1	4	5	5	5	4	5	5	3	4
5	5	5	5	4	5	5	5	5	4	4	4	5	5	5	5	5	5	5	5	5	5	5	4	5	4	4	4	5	5	5	5	5	4	4
5	5	5	5	5	5	5	3	5	4	4	4	5	5	5	5	5	5	5	5	5	4	4	5	4	3	5	5	5	5	5	5	4	5	4
5	5	5	5	5	4	4	4	4	4	4	4	4	4	5	5	4	4	5	5	5	5	5	5	5	5	5	4	5	4	4	4	5	4	5
4	4	4	4	5	5	5	5	4	4	4	4	4	4	4	4	4	3	4	3	3	3	4	2	2	4	5	5	5	5	4	5	5	4	5
4	5	3	4	4	4	4	3	4	3	4	3	4	4	5	4	4	4	4	4	4	3	3	4	2	4	4	4	4	3	5	2	4	2	4
4	4	4	4	5	5	3	2	3	4	5	4	4	5	5	4	4	4	2	3	4	1	5	3	4	3	4	5	5	3	4	5	5	2	5
5	4	4	4	4	3	4	3	5	5	4	5	4	4	4	4	4	5	4	4	4	3	4	5	3	4	5	4	5	4	5	4	4	5	5
4	5	4	4	5	5	4	5	5	5	5	5	5	5	4	5	4	5	5	5	5	5	5	5	5	5	4	4	4	5	5	5	4	4	4
5	5	5	5	5	5	5	5	4	5	4	4	4	4	5	5	4	5	4	5	4	5	4	5	1	1	4	4	5	5	5	4	4	4	4
4	4	4	4	5	4	4	4	3	4	4	3	3	3	3	4	4	3	3	3	3	4	4	4	4	1	5	5	4	4	2	4	4	4	2
5	5	5	5	5	4	5	4	3	3	3	4	5	3	5	5	5	5	5	4	3	4	5	3	3	2	5	5	3	3	5	5	5	5	5
4	4	4	3	4	4	2	2	2	3	5	5	5	4	5	5	5	1	5	1	3	3	1	1	1	1	5	5	5	4	4	4	3	1	5
3	4	4	4	4	4	3	3	4	4	4	4	4	3	4	4	4	4	4	4	2	2	4	4	4	4	4	5	4	3	2	4	4	5	5
1	1	1	1	1	1	1	1	1	1	1	2	5	5	5	5	2	1	2	1	1	5	4	1	1	1	5	1	3	3	1	5	4	3	5
5	5	5	5	4	5	5	4	5	4	5	4	4	5	4	3	4	4	5	3	4	3	4	4	2	2	3	4	5	5	3	3	4	4	5
1	1	1	1	1	1	1	1	2	2	1	1	1	1	1	1	1	1	1	1	1	1	3	1	5	1	3	1	4	4	2	1	1	3	1
2	1	1	1	2	1	2	1	1	1	1	1	1	1	1	1	1	1	1	1	1	2	2	2	2	2	2	1	1	1	1	2	2	2	2
1	1	1	1	1	1	2	1	2	2	2	1	1	2	2	2	1	1	1	1	1	2	3	3	3	3	2	1	1	1	2	2	2	2	2
4	2	2	2	2	5	5	5	3	3	3	3	3	1	1	1	2	4	4	4	4	4	2	2	2	2	2	4	4	4	4	2	2	5	1
3	3	3	3	3	2	2	2	2	2	3	2	2	3	2	2	2	2	3	3	3	3	4	3	4	3	2	3	3	3	3	2	2	3	2
1	2	2	1	1	1	2	3	3	3	2	2	2	5	2	2	3	3	3	4	4	5	5	5	5	5	5	3	4	4	5	5	5	5	1
2	2	2	1	1	1	1	2	2	3	2	1	2	4	2	2	1	1	2	2	2	2	4	2	4	4	3	2	3	2	3	2	2	2	2
1	1	1	1	1	1	1	1	2	1	2	2	2	1	1	2	1	1	1	1	1	1	3	2	4	2	2	2	2	1	2	2	1	3	2
2	2	2	2	2	2	2	2	2	2	2	2	2	2	2	2	2	2	2	2	2	2	2	2	2	2	2	2	2	2	2	2	2	2	2
3	4	2	2	3	4	4	3	2	2	3	4	4	3	2	2	3	3	2	3	3	4	2	4	2	4	2	3	4	4	4	2	2	3	2
1	1	1	1	1	1	1	1	1	1	1	1	1	3	1	1	1	1	1	1	1	1	5	1	3	5	4	1	1	1	1	1	1	3	1
2	2	2	2	3	2	2	1	2	3	2	2	2	2	2	2	2	2	2	2	2	2	2	2	2	2	2	2	2	2	2	2	2	2	2
5	5	4	4	5	5	5	5	5	4	5	5	5	5	5	5	5	5	5	5	5	4	4	4	4	4	5	5	5	5	5	5	5	5	5
1	1	1	1	1	1	1	1	1	1	1	1	1	1	1	3	1	3	2	4	3	3	1	1	1	1	1	3	3	2	2	1	2	3	1
1	1	1	1	1	1	1	1	1	1	1	1	1	1	1	1	1	1	1	1	1	4	5	4	5	5	3	3	1	1	3	1	1	4	1
2	2	2	1	2	2	3	3	3	2	3	3	2	1	1	1	3	3	2	3	1	3	2	2	2	3	2	2	2	2	3	3	2	3	3
1	1	1	1	1	1	1	1	1	2	1	2	2	3	2	2	2	2	2	2	3	3	4	4	2	4	3	1	1	1	1	1	1	5	2
5	5	5	5	5	4	4	4	3	3	4	3	4	4	4	4	3	3	4	4	3	4	3	3	4	4	4	4	4	4	3	4	4	3	4
2	2	2	2	2	2	2	2	1	2	2	1	2	4	2	2	2	2	2	5	3	3	4	2	2	2	2	2	2	2	2	2	2	2	2
1	1	1	1	1	1	1	2	1	1	1	1	1	3	1	1	1	1	1	1	1	1	5	4	4	4	5	1	1	1	2	1	1	1	1
1	1	1	1	1	2	2	2	4	4	2	2	2	2	2	2	4	4	2	4	4	4	4	4	4	5	5	1	1	2	2	1	1	1	1
5	5	5	5	5	5	5	5	5	5	5	5	5	5	5	5	5	5	5	5	5	5	5	5	5	5	5	5	5	5	5	5	5	5	5
2	2	2	2	3	2	2	2	2	2	1	2	1	3	2	2	2	1	1	2	2	2	1	4	2	2	2	1	2	1	3	2	1	4	2
