# Supplementary material
Source: Research Square preprint supplement (doi:10.21203/rs.3.rs-8147817/v1)
Supplement: Supplementary file 2 [file db85c8bb338a729a32fe81e2.docx]

Hypothesis test

|  | **Original sample (O)** | **Sample mean (M)** | **Standard deviation (STDEV)** | **T statistics (|O/STDEV|)** | **P values** |
| --- | --- | --- | --- | --- | --- |
| **AI Adoption -> Future-Ready Skills** | 0.668 | 0.670 | 0.039 | 17.019 | 0.000 |
| **AI Literacy -> AI Adoption** | -0.139 | -0.139 | 0.087 | 1.602 | 0.109 |
| **Future-Ready Skills -> Graduate Employability** | 0.821 | 0.821 | 0.023 | 34.981 | 0.000 |
| **Institutional Support -> AI Adoption** | 0.672 | 0.674 | 0.077 | 8.742 | 0.000 |
| **Perceived Ease of use -> AI Adoption** | 0.285 | 0.287 | 0.096 | 2.966 | 0.003 |
| **Perceived Usefulness -> AI Adoption** | -0.005 | -0.009 | 0.094 | 0.055 | 0.956 |

Mediation test

|  | **Original sample (O)** | **Sample mean (M)** | **Standard deviation (STDEV)** | **T statistics (|O/STDEV|)** | **P values** |
| --- | --- | --- | --- | --- | --- |
| **AI Adoption -> Future-Ready Skills -> Graduate Employability** | 0.549 | 0.550 | 0.039 | 14.076 | 0.000 |

**R-square**

|  | **R-square** | **R-square adjusted** |
| --- | --- | --- |
| **AI Adoption** | 0.661 | 0.655 |
| **Future-Ready Skills** | 0.447 | 0.444 |
| **Graduate Employability** | 0.674 | 0.672 |

Model Fit

|  | **Saturated model** | **Estimated model** |
| --- | --- | --- |
| **SRMR** | 0.061 | 0.176 |
| **d_ULS** | 1.722 | 14.416 |
| **d_G** | 1.128 | 1.476 |
| **Chi-square** | 1413.897 | 1643.497 |
| **NFI** | 0.824 | 0.795 |

Items Loading Matrix

|  | **AI Adoption** | **AI Literacy** | **Future-Ready Skills** | **Graduate Employability** | **Institutional Support** | **Perceived Ease of use** | **Perceived Usefulness** |
| --- | --- | --- | --- | --- | --- | --- | --- |
| **AI1** | 0.915 |  |  |  |  |  |  |
| **AI2** | 0.841 |  |  |  |  |  |  |
| **AI4** | 0.755 |  |  |  |  |  |  |
| **AIL1** |  | 0.907 |  |  |  |  |  |
| **AIL2** |  | 0.949 |  |  |  |  |  |
| **AIL3** |  | 0.939 |  |  |  |  |  |
| **AIL4** |  | 0.931 |  |  |  |  |  |
| **AIL5** |  | 0.903 |  |  |  |  |  |
| **FRS3** |  |  | 0.888 |  |  |  |  |
| **FRS4** |  |  | 0.918 |  |  |  |  |
| **FRS5** |  |  | 0.922 |  |  |  |  |
| **GE1** |  |  |  | 0.718 |  |  |  |
| **GE2** |  |  |  | 0.884 |  |  |  |
| **GE3** |  |  |  | 0.913 |  |  |  |
| **GE5** |  |  |  | 0.817 |  |  |  |
| **IA1** |  |  |  |  | 0.802 |  |  |
| **IS2** |  |  |  |  | 0.898 |  |  |
| **IS3** |  |  |  |  | 0.931 |  |  |
| **IS4** |  |  |  |  | 0.917 |  |  |
| **IS5** |  |  |  |  | 0.831 |  |  |
| **PEU1** |  |  |  |  |  | 0.885 |  |
| **PEU2** |  |  |  |  |  | 0.909 |  |
| **PEU3** |  |  |  |  |  | 0.895 |  |
| **PEU4** |  |  |  |  |  | 0.824 |  |
| **PEU5** |  |  |  |  |  | 0.868 |  |
| **PU1** |  |  |  |  |  |  | 0.885 |
| **PU2** |  |  |  |  |  |  | 0.917 |
| **PU3** |  |  |  |  |  |  | 0.920 |
| **PU4** |  |  |  |  |  |  | 0.822 |
| **PU5** |  |  |  |  |  |  | 0.895 |

Items Loading List

|  | **Outer loadings** |
| --- | --- |
| **AI1 <- AI Adoption** | 0.915 |
| **AI2 <- AI Adoption** | 0.841 |
| **AI4 <- AI Adoption** | 0.755 |
| **AIL1 <- AI Literacy** | 0.907 |
| **AIL2 <- AI Literacy** | 0.949 |
| **AIL3 <- AI Literacy** | 0.939 |
| **AIL4 <- AI Literacy** | 0.931 |
| **AIL5 <- AI Literacy** | 0.903 |
| **FRS3 <- Future-Ready Skills** | 0.888 |
| **FRS4 <- Future-Ready Skills** | 0.918 |
| **FRS5 <- Future-Ready Skills** | 0.922 |
| **GE1 <- Graduate Employability** | 0.718 |
| **GE2 <- Graduate Employability** | 0.884 |
| **GE3 <- Graduate Employability** | 0.913 |
| **GE5 <- Graduate Employability** | 0.817 |
| **IA1 <- Institutional Support** | 0.802 |
| **IS2 <- Institutional Support** | 0.898 |
| **IS3 <- Institutional Support** | 0.931 |
| **IS4 <- Institutional Support** | 0.917 |
| **IS5 <- Institutional Support** | 0.831 |
| **PEU1 <- Perceived Ease of use** | 0.885 |
| **PEU2 <- Perceived Ease of use** | 0.909 |
| **PEU3 <- Perceived Ease of use** | 0.895 |
| **PEU4 <- Perceived Ease of use** | 0.824 |
| **PEU5 <- Perceived Ease of use** | 0.868 |
| **PU1 <- Perceived Usefulness** | 0.885 |
| **PU2 <- Perceived Usefulness** | 0.917 |
| **PU3 <- Perceived Usefulness** | 0.920 |
| **PU4 <- Perceived Usefulness** | 0.822 |
| **PU5 <- Perceived Usefulness** | 0.895 |

Construct validity and reliability

|  | **Cronbach's alpha** | **Composite reliability (rho_a)** | **Composite reliability (rho_c)** | **Average variance extracted (AVE)** |
| --- | --- | --- | --- | --- |
| **AI Adoption** | 0.790 | 0.825 | 0.877 | 0.705 |
| **AI Literacy** | 0.958 | 0.959 | 0.968 | 0.857 |
| **Future-Ready Skills** | 0.895 | 0.895 | 0.935 | 0.827 |
| **Graduate Employability** | 0.853 | 0.856 | 0.902 | 0.699 |
| **Institutional Support** | 0.925 | 0.935 | 0.943 | 0.770 |
| **Perceived Ease of use** | 0.924 | 0.928 | 0.943 | 0.768 |
| **Perceived Usefulness** | 0.933 | 0.934 | 0.949 | 0.790 |

Discriminant validity

|  | **AI Adoption** | **AI Literacy** | **Future-Ready Skills** | **Graduate Employability** | **Institutional Support** | **Perceived Ease of use** | **Perceived Usefulness** |
| --- | --- | --- | --- | --- | --- | --- | --- |
| **AI Adoption** | 0.840 |  |  |  |  |  |  |
| **AI Literacy** | 0.578 | 0.926 |  |  |  |  |  |
| **Future-Ready Skills** | 0.668 | 0.761 | 0.909 |  |  |  |  |
| **Graduate Employability** | 0.653 | 0.795 | 0.821 | 0.836 |  |  |  |
| **Institutional Support** | 0.802 | 0.723 | 0.780 | 0.787 | 0.877 |  |  |
| **Perceived Ease of use** | 0.720 | 0.824 | 0.783 | 0.794 | 0.824 | 0.877 |  |
| **Perceived Usefulness** | 0.683 | 0.818 | 0.820 | 0.866 | 0.832 | 0.851 | 0.889 |

**Predict Result**

|  | **Q²predict** | **PLS-SEM_RMSE** | **PLS-SEM_MAE** | **LM_RMSE** | **LM_MAE** | **IA_RMSE** | **IA_MAE** |
| --- | --- | --- | --- | --- | --- | --- | --- |
| **AI1** | 0.632 | 0.809 | 0.629 | 0.799 | 0.587 | 1.335 | 1.141 |
| **AI2** | 0.400 | 1.006 | 0.764 | 0.990 | 0.766 | 1.300 | 1.125 |
| **AI4** | 0.309 | 1.004 | 0.814 | 1.068 | 0.852 | 1.208 | 1.025 |
| **FRS3** | 0.474 | 0.913 | 0.725 | 0.778 | 0.595 | 1.258 | 1.058 |
| **FRS4** | 0.431 | 0.914 | 0.730 | 0.898 | 0.693 | 1.212 | 1.007 |
| **FRS5** | 0.455 | 0.915 | 0.752 | 0.842 | 0.633 | 1.239 | 1.011 |
| **GE1** | 0.320 | 0.975 | 0.815 | 0.894 | 0.720 | 1.182 | 1.023 |
| **GE2** | 0.346 | 0.995 | 0.829 | 0.818 | 0.637 | 1.230 | 1.003 |
| **GE3** | 0.418 | 0.998 | 0.838 | 0.832 | 0.631 | 1.309 | 1.083 |
| **GE5** | 0.293 | 1.176 | 0.955 | 0.924 | 0.688 | 1.399 | 1.174 |

**Predict Summary**

|  | **Q²predict** | **RMSE** | **MAE** |
| --- | --- | --- | --- |
| **AI Adoption** | 0.644 | 0.601 | 0.465 |
| **Future-Ready Skills** | 0.550 | 0.678 | 0.539 |
| **Graduate Employability** | 0.498 | 0.715 | 0.580 |

Post Hoc Power Analysis – Achieved Power

|  | **Path coefficients** | **Alpha 1%** | **Alpha 5%** |
| --- | --- | --- | --- |
| **AI Adoption -> Future-Ready Skills** | 0.668 | 1.000 | 1.000 |
| **AI Literacy -> AI Adoption** | -0.139 | 0.410 | 0.675 |
| **Future-Ready Skills -> Graduate Employability** | 0.821 | 1.000 | 1.000 |
| **Institutional Support -> AI Adoption** | 0.672 | 1.000 | 1.000 |
| **Perceived Ease of use -> AI Adoption** | 0.285 | 0.977 | 0.996 |
| **Perceived Usefulness -> AI Adoption** | -0.005 | 0.012 | 0.059 |

Post Hoc Power Analysis – Minimum size

|  | **Path coefficients** | **Alpha 1%, power 80%** | **Alpha 5%, power 80%** | **Alpha 1%, power 90%** | **Alpha 5%, power 90%** |
| --- | --- | --- | --- | --- | --- |
| **AI Adoption -> Future-Ready Skills** | 0.668 | 23.000 | 14.000 | 30.000 | 20.000 |
| **AI Literacy -> AI Adoption** | -0.139 | 522.000 | 322.000 | 677.000 | 446.000 |
| **Future-Ready Skills -> Graduate Employability** | 0.821 | 15.000 | 10.000 | 20.000 | 13.000 |
| **Institutional Support -> AI Adoption** | 0.672 | 23.000 | 14.000 | 29.000 | 19.000 |
| **Perceived Ease of use -> AI Adoption** | 0.285 | 124.000 | 77.000 | 161.000 | 106.000 |
| **Perceived Usefulness -> AI Adoption** | -0.005 | 375447.000 | 231289.000 | 486963.000 | 320373.000 |
